# Supplementary figures and images for: A convenient method for determining the concentration of hydrogen in water: use of methylene blue with colloidal platinum
Source: Springer Nature journal article supplement (doi:10.1186/2045-9912-2-1), 2012-01-01

Oxidimetry  
method  
(mg/L)

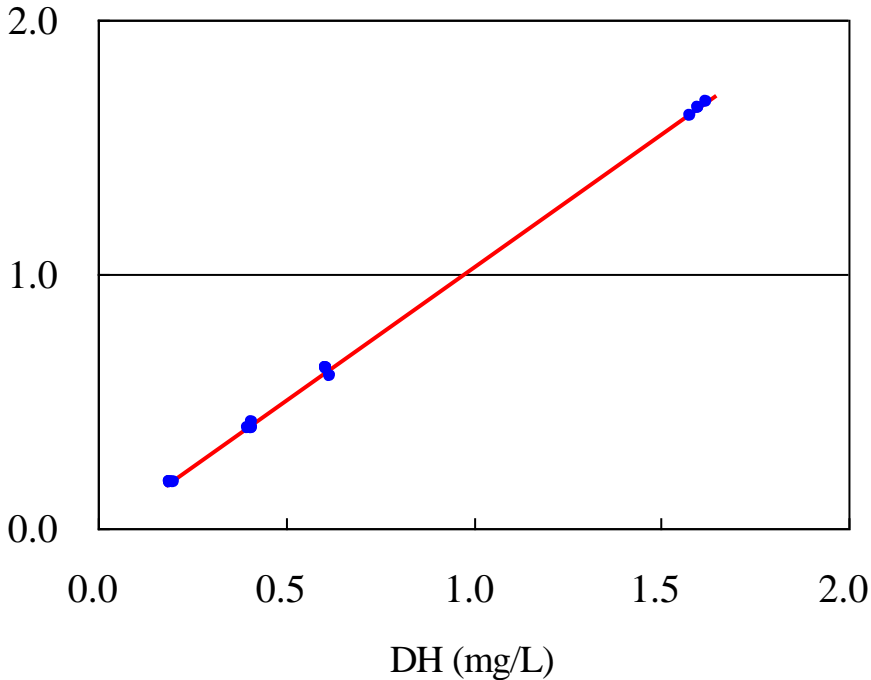

Supplement: 13618_2011_32_MOESM3_ESM.pdf [file 13618_2011_32_MOESM3_ESM.pdf]

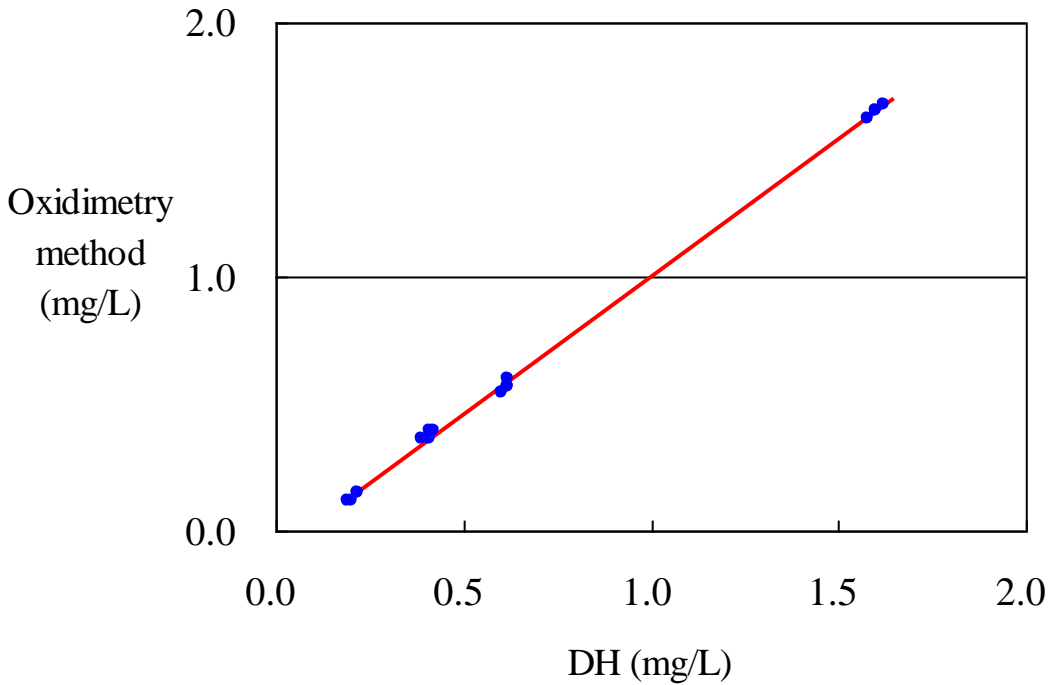

Supplement: 13618_2011_32_MOESM4_ESM.pdf [file 13618_2011_32_MOESM4_ESM.pdf]
